# Supplementary material for: Southern Ocean control on atmospheric CO 2 changes across late Pliocene Marine Isotope Stage M2
Source: Copernicus journal article supplement (doi:10.5194/cp-21-79-2025), 2025-01-14
Supplement: Supplementary file 1 [file cp-21-79-2025-supplement.pdf]

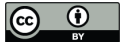

*Supplement of*

## **Southern Ocean control on atmospheric CO<sub>2</sub> changes across late Pliocene Marine Isotope Stage M2**

**Suning Hou et al.**

*Correspondence to:* Suning Hou (s.hou@uu.nl)

The copyright of individual parts of the supplement might differ from the article licence.

# Supplement

**This file includes:**

Table S1

Figure S1, S2

**Table S1: Datums of the late-Pliocene Site 1168A. Tie points as indicated in Fig. 3.**

| Number | Datum type                                                              | Hole  | Remark               | Age (ka) | Age min | Age max | Depth (mbsf) | Depth min | Depth max | Source            |
|--------|-------------------------------------------------------------------------|-------|----------------------|----------|---------|---------|--------------|-----------|-----------|-------------------|
| 1      | L*                                                                      | 1168A | G17                  | 2940     | 2937    | 2960    | 28.5         |           |           | Exon et al., 2001 |
| 2      | $\delta^{18}\text{O}_{\text{bulk}}$                                     | 1168A | G20                  | 3008.4   | 3000    | 3025    | 29.99        | 29.8      | 30.2      | This study        |
| 3      | $\delta^{18}\text{O}_{\text{bulk}}$                                     | 1168A | G21–<br>G20<br>slope | 3031     | 3030    | 3032    | 30.505       | 30.22     | 30.79     | This study        |
| 4      | $\delta^{18}\text{O}_{\text{bf}}/\delta^{18}\text{O}_{\text{bulk}}$     | 1168A | KM3–<br>KM2<br>slope | 3146.82  | 3142    | 3151    | 32.71        | 32.51     | 32.78     | This study        |
| 5      | $L^*/\delta^{18}\text{O}_{\text{bf}}$                                   | 1168A | M1                   | 3248     |         |         | 34.225       |           |           | This study        |
| 6      | $L^*/\delta^{18}\text{O}_{\text{bf}}/\delta^{18}\text{O}_{\text{bulk}}$ | 1168A | M2                   | 3298     |         |         | 35.2         |           |           | This study        |
| 7      | $L^*/\delta^{18}\text{O}_{\text{bf}}/\delta^{18}\text{O}_{\text{bulk}}$ | 1168A | MG1                  | 3324     |         |         | 35.95        | 35.84     | 36.235    | This study        |
| 8      | $L^*/\delta^{18}\text{O}_{\text{bulk}}/\delta^{18}\text{O}_{\text{bf}}$ | 1168A | MG3                  | 3364.6   |         |         | 36.8         | 36.67     | 37.17     | This study        |

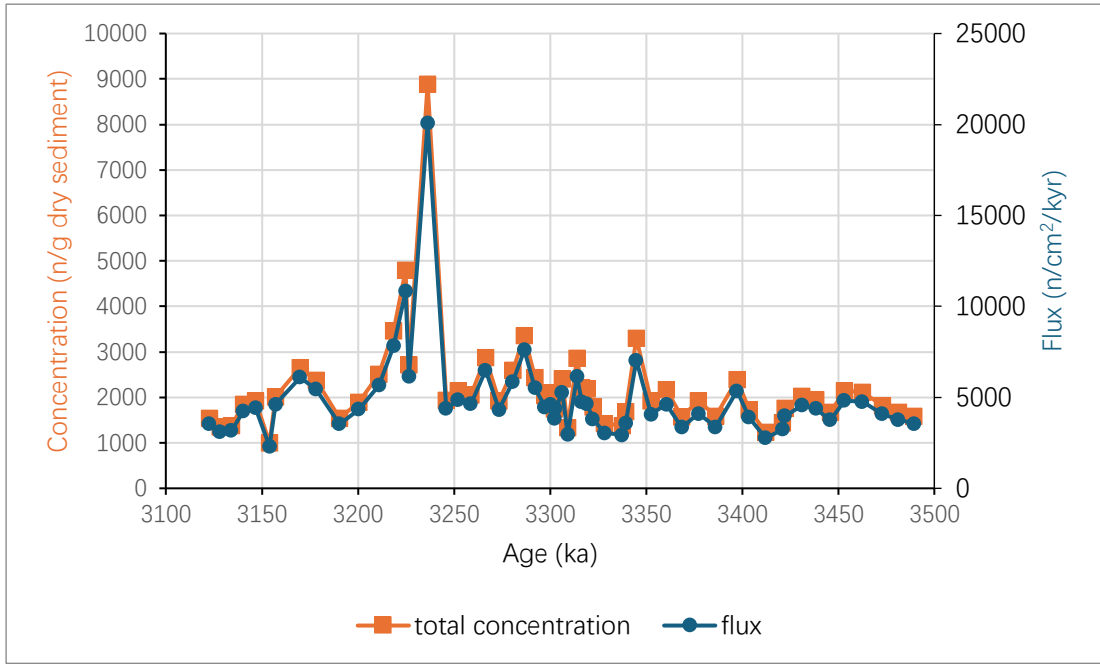

Figure S1: Total concentration and burial flux of dinocysts.

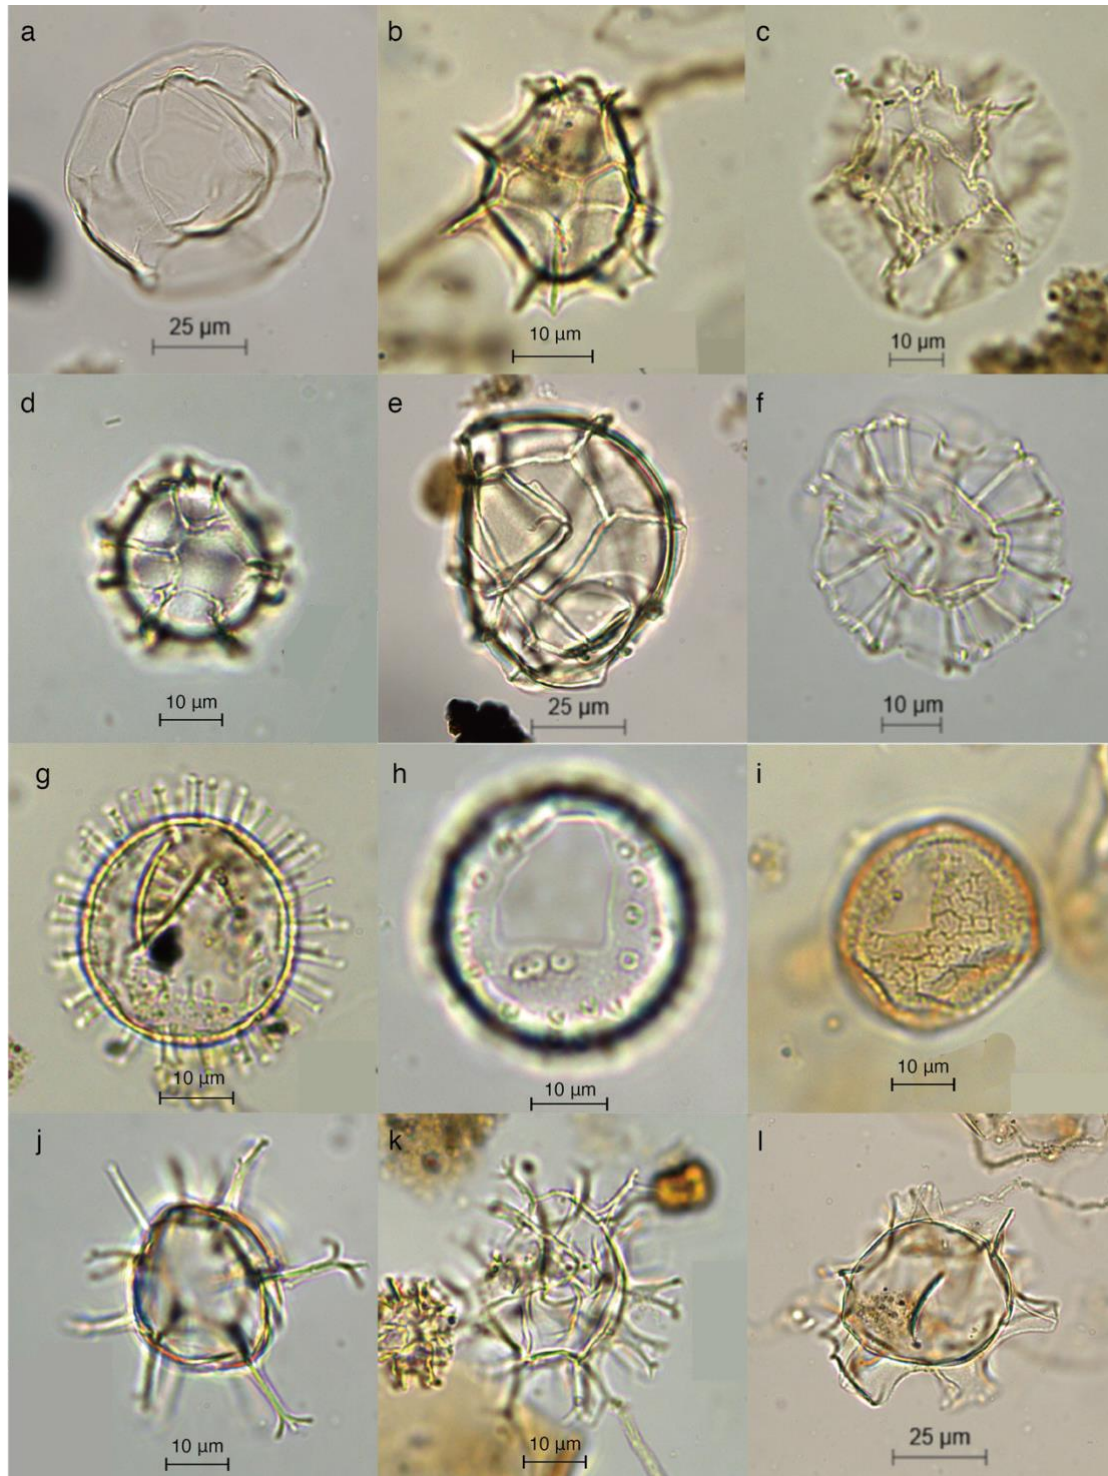

Figure S2: a. *Invertocysta tabulata* (Sample 189-1168A-5H2W, 100–102 cm) b. *Impagidinium aculeatum* (Sample 189-1168A-5H2W, 40–42 cm) c. *Impagidinium pallidum* (Sample 189-1168A-4H6W, 25.5–27.5 cm) d. *Impagidinium paradoxum* (Sample 189-1168A-5H1W, 75–77 cm) e. *Impagidinium patulum* f. *Nemosphaeropsis labyrinthus* (Sample 189-1168A-5H1W, 75–77 cm) g. *Operculodinium centrocarpum* (Sample 189-1168A-4H6W, 25.5–27.5 cm) h. *Operculodinium janduchenei* (Sample 189-1168A-5H1W, 75–77 cm) i. *Pyxidinospis reticulata* (Sample 189-1168A-5H2W, 40–42 cm); j. *Spiniferites* spp. (Sample 189-1168A-5H1W, 75–77 cm) k. *Spiniferites* spp. (Sample 189-1168A-5H1W, 14–16 cm) l. *Spiniferites* spp. (*rubinus/coniconcavus*) (Sample 189-1168A-5H2W, 40–42 cm)
